# Supplementary material for: αvβ3 Integrin induces partial EMT independent of TGF-β signaling
Source: PubMed Central journal article supplement (PMC8060333; doi:10.1038/s42003-021-02003-6), 2021-04-21
Supplement: 42003_2021_2003_MOESM1_ESM.pdf [file 42003_2021_2003_MOESM1_ESM.pdf]

## Supplementary Information

### **$\alpha$ v $\beta$ 3 integrin induces partial EMT independent of TGF- $\beta$ signaling**

Yoshinobu Kariya<sup>1,#,\*</sup>, Midori Oyama<sup>1,#</sup>, Takato Suzuki<sup>2,3</sup>, Yukiko Kariya<sup>1</sup>

<sup>1</sup>Department of Biochemistry, <sup>2</sup>Laboratory Animal Research Center, Fukushima Medical University School of Medicine, <sup>3</sup>Department of Clinical Laboratory Medicine, Fukushima Medical University Hospital, 1 Hikarigaoka, Fukushima City, Fukushima 960-1295, Japan

<sup>#</sup>Equal contribution

#### **\*Corresponding Author:**

Yoshinobu Kariya, Ph.D.

Department of Biochemistry, Fukushima Medical University School of Medicine, 1 Hikarigaoka, Fukushima City, Fukushima 960-1295, Japan.

Phone: +81-24-547-1144; Fax: +81-24-548-8641

E-mail: kariya@fmu.ac.jp

**a**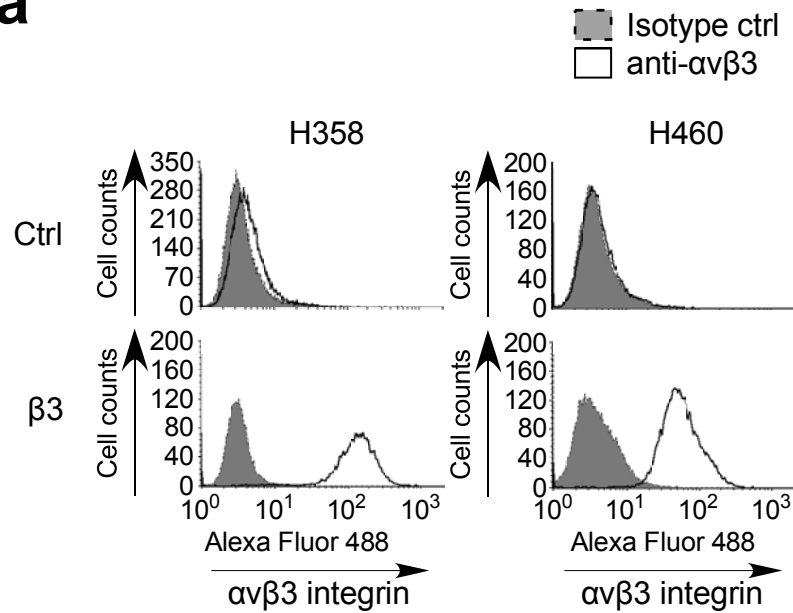**b**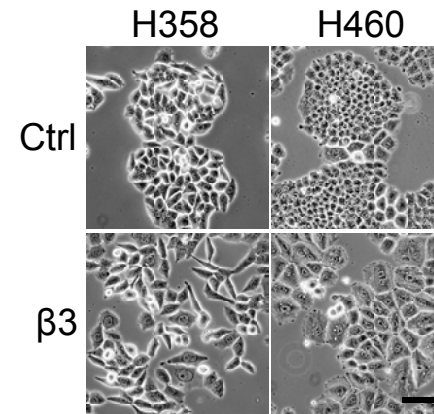

**Supplementary Figure 1. Cell morphological changes of H358 and H460 cells by  $\alpha$ v $\beta$ 3 integrin expression.** **a** FACS analysis of the cell surface expression of  $\alpha$ v $\beta$ 3 integrin in control or  $\beta$ 3 integrin expressing H358 and H460 cells. **b** Cell morphology of control or  $\beta$ 3 integrin expressing H358 and H460 cells. Scale bar, 100  $\mu$ m.

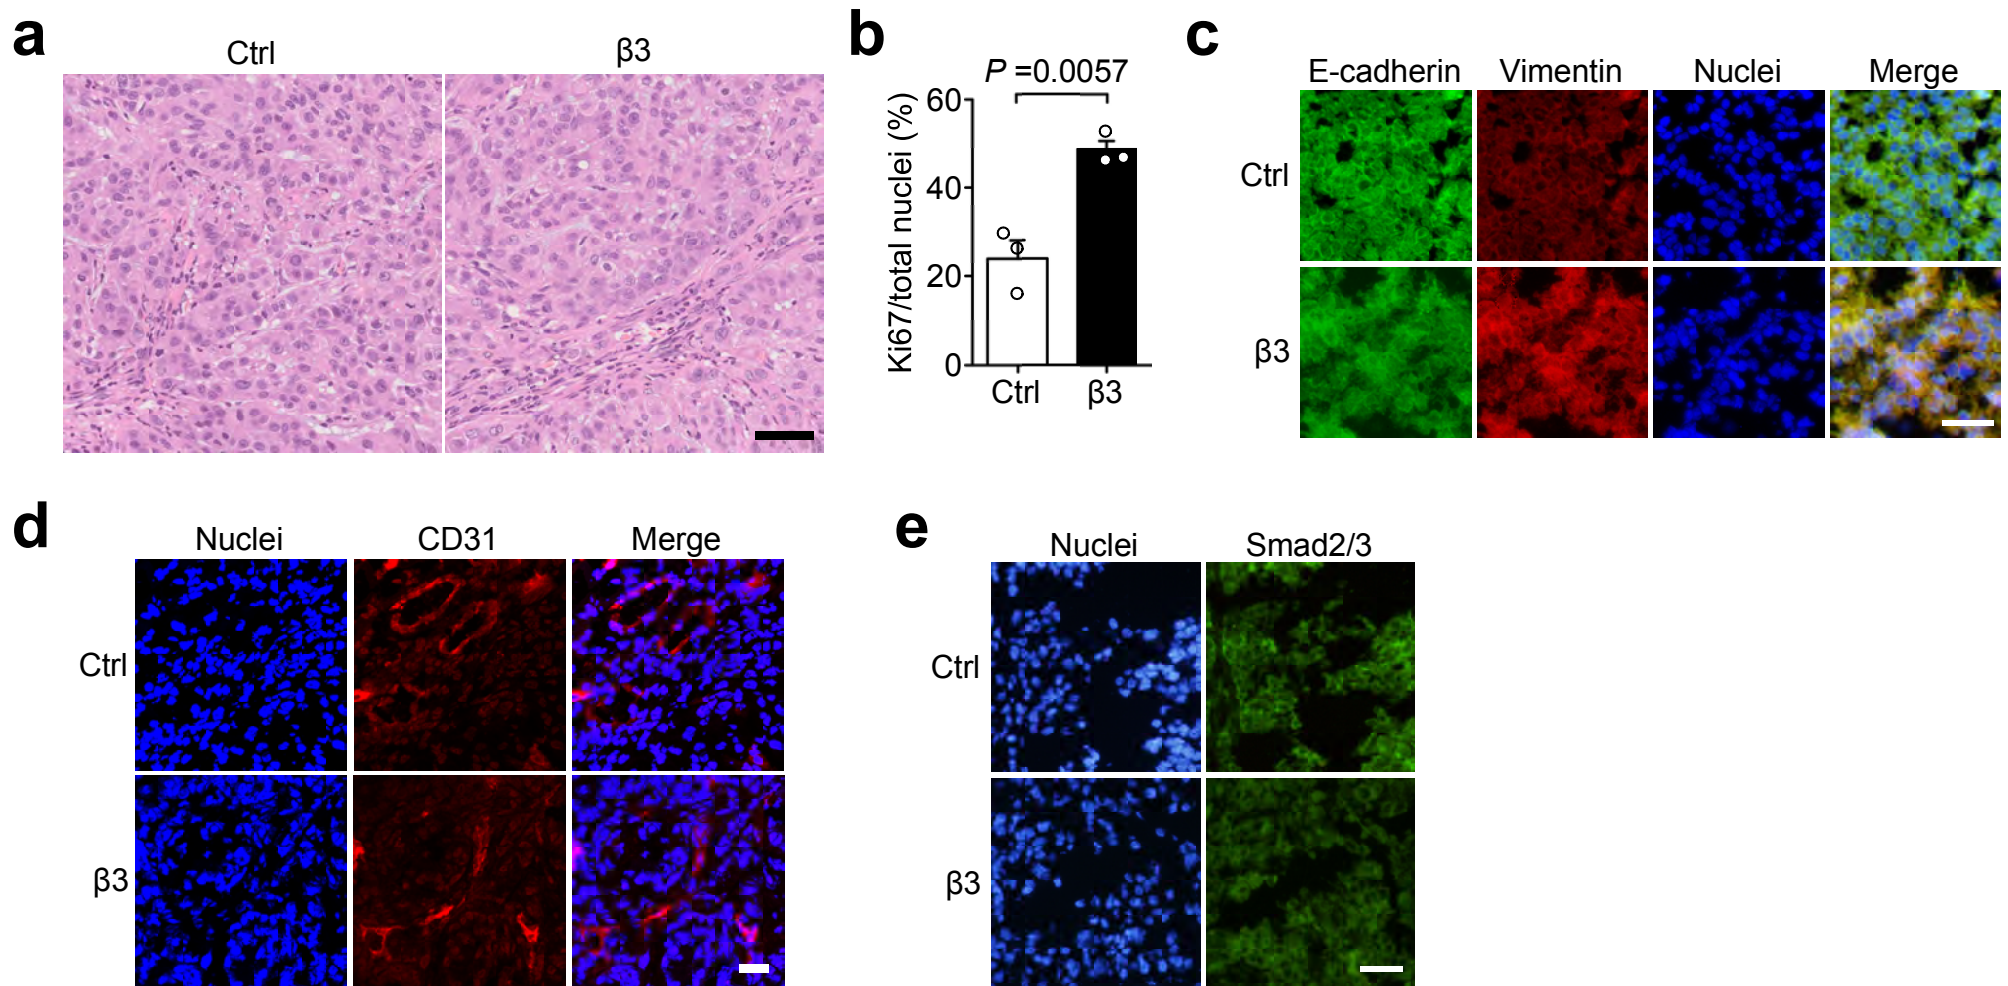

**Supplementary Figure 2. Histological characterization of tumors arising from grafting of  $\beta 3$ -A549 cells.**

**a** Representative pictures from H&E-stained tumors arising from control and  $\beta 3$ -A549 cells. Scale bar, 50  $\mu\text{m}$ .

**b** *In vivo* cell proliferation assay in tumors arising from control and  $\beta 3$ -A549 cells. Two-tailed unpaired Student's

t-test, mean  $\pm$  s.e.m.,  $n = 3$  per group. **c** Immunofluorescence-based single cell analysis using anti-E-cadherin (green) and vimentin (red) antibodies in tumors arising from control and  $\beta 3$ -A549 cells.  $n = 3$  per group. Scale bar, 50  $\mu\text{m}$ .

**d, e** CD31 (**d**, red) and Smad2/3 (**e**, green) immunofluorescence staining in tumors arising from control and  $\beta 3$ -A549 cells.  $n = 3$  per group. Scale bars, 50  $\mu\text{m}$ . Nuclear staining was used to detect nuclei (blue). Source data for **b** are available in Supplementary Data 1.

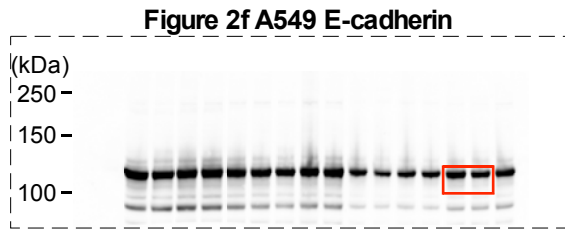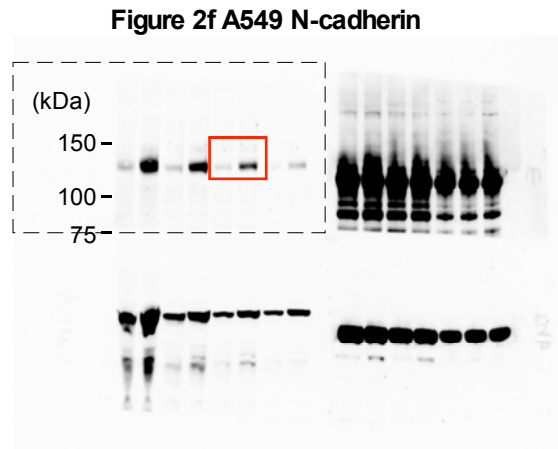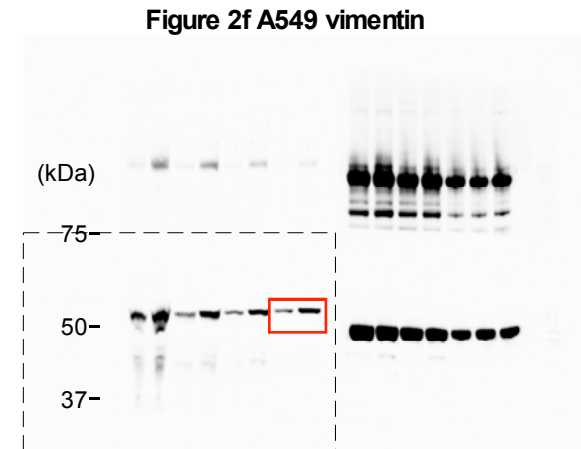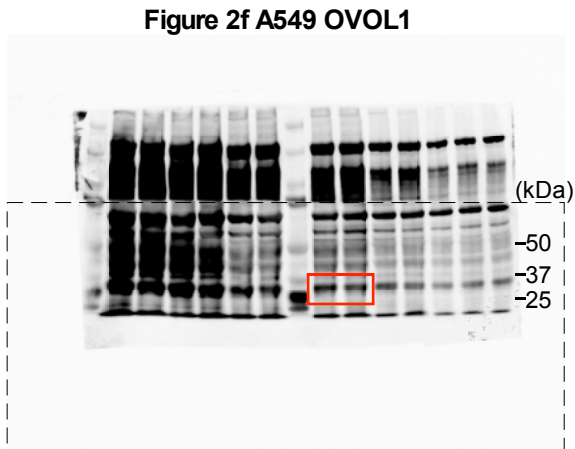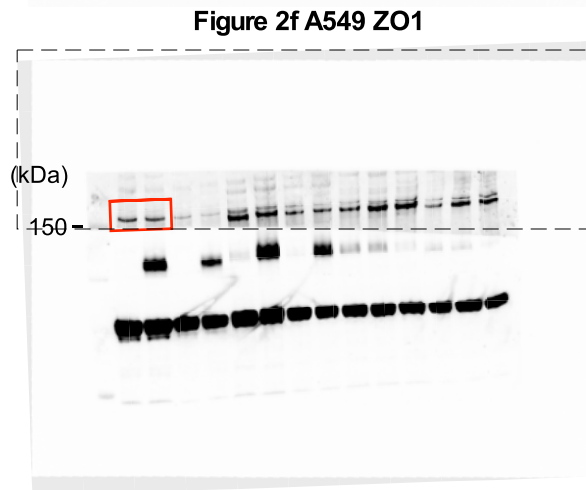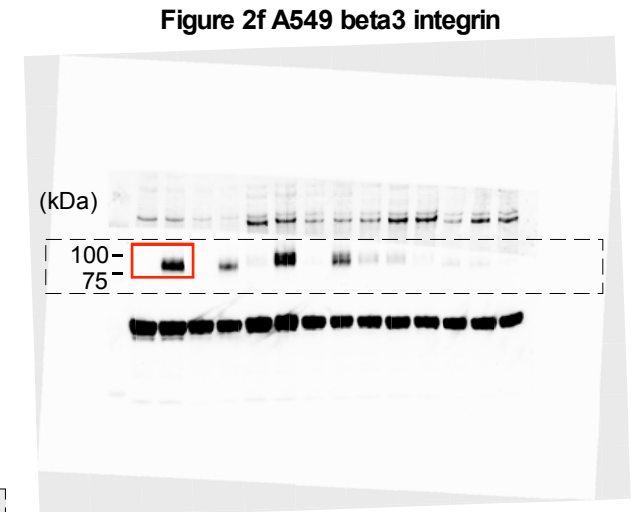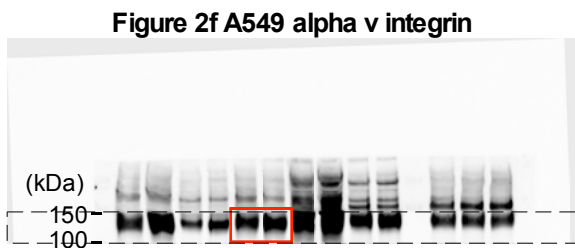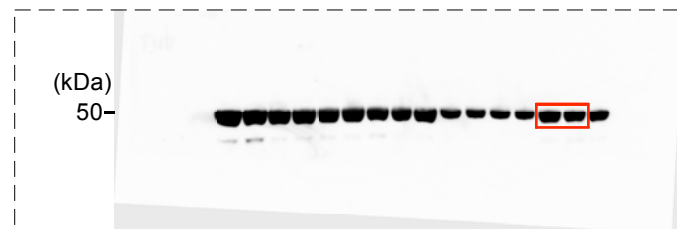

**Supplementary Figure 3. Unprocessed blot images in Fig. 2f. Dotted squares indicate blotting membranes. Red squares indicate cropped sections.**

Figure 2f H358 E-cadherin

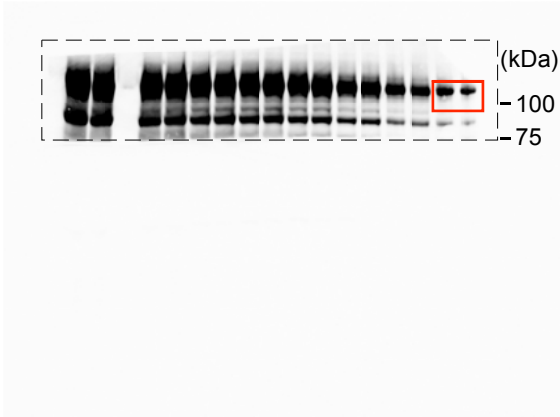

Figure 2f H358 N-cadherin

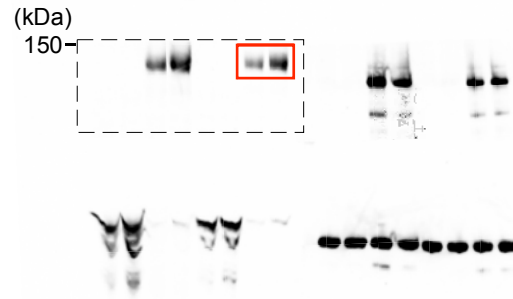

Figure 2f H358 vimentin

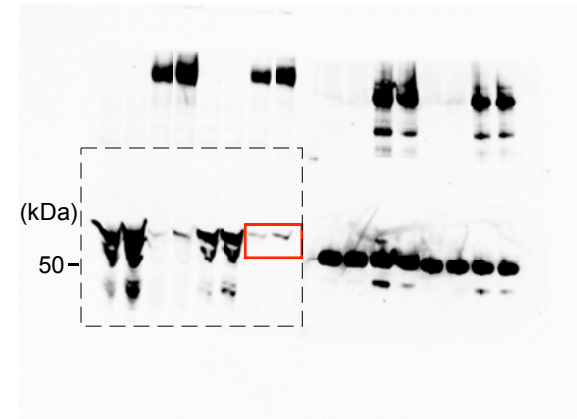

Figure 2f H358 OVOL1

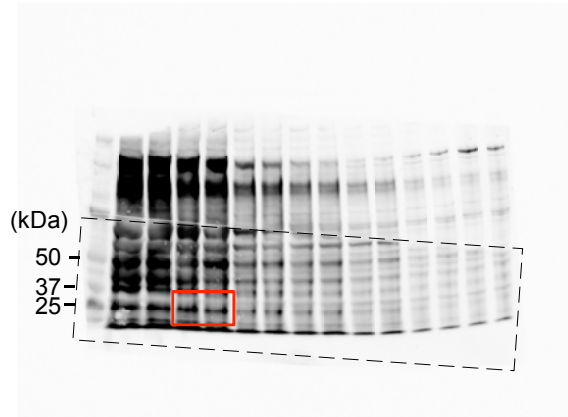

Figure 2f H358 ZO1 & beta3 integrin

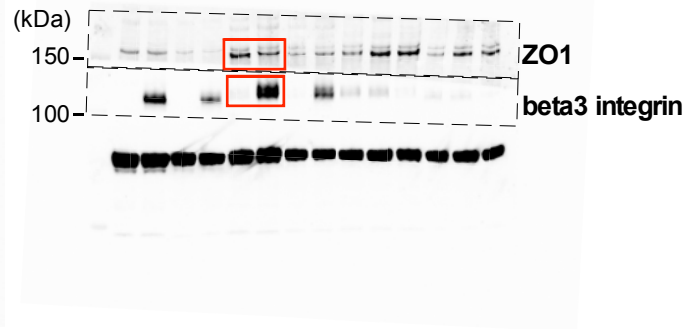

Figure 2f H358 alpha v integrin

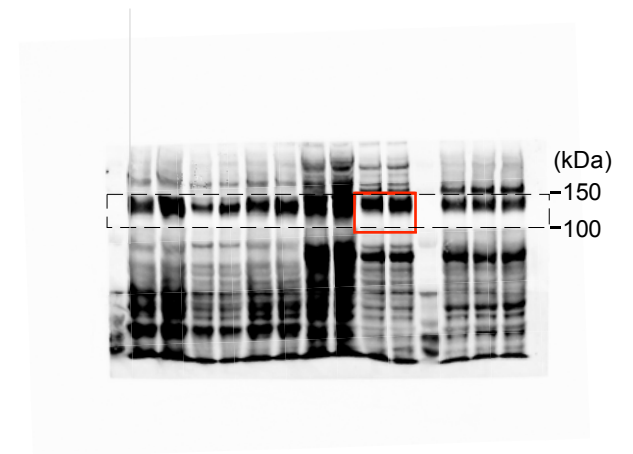

Figure 2f H358 alpha-tubulin

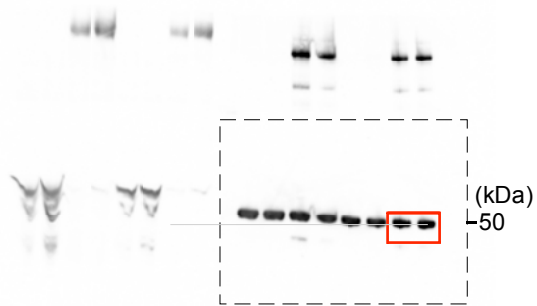

Supplementary Figure 4. Unprocessed blot images in Fig. 2f. Dotted squares indicate blotting membranes. Red squares indicate cropped sections.

Figure 2h E-cadherin

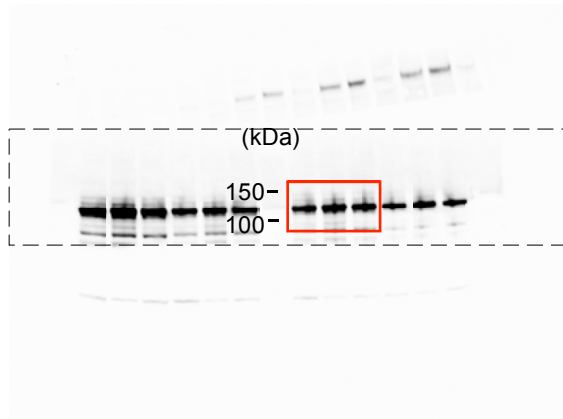

Figure 2h vimentin

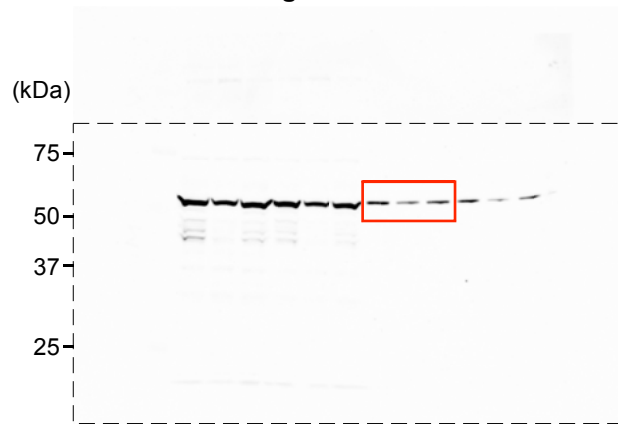

Figure 2h ZEB1

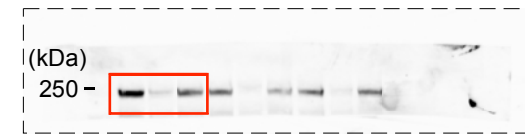

Figure 2h beta3 integrin

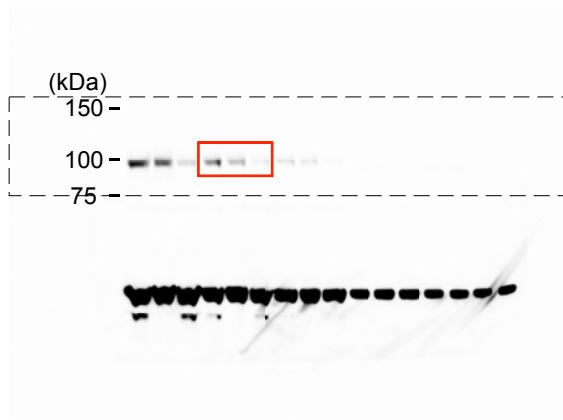

Figure 2h alpha-tubulin

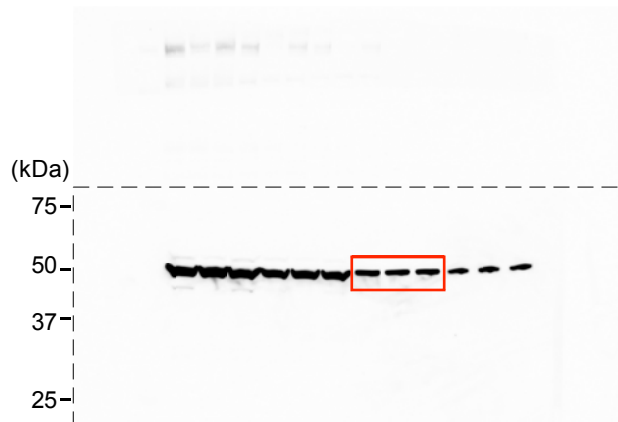

Figure 2h alpha v integrin

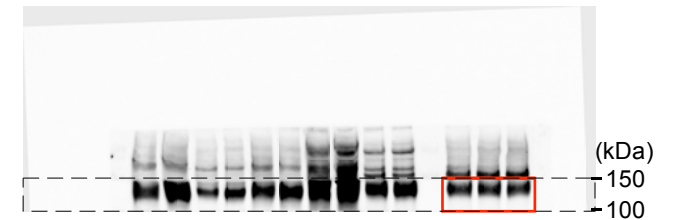

**Supplementary Figure 5. Unprocessed blot images in Fig. 2h.** Dotted squares indicate blotting membranes. Red squares indicate cropped sections.

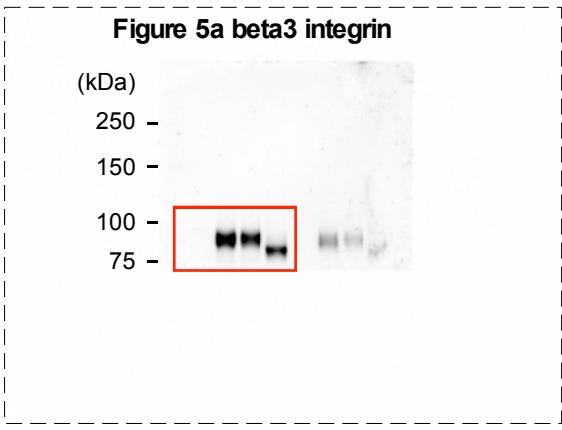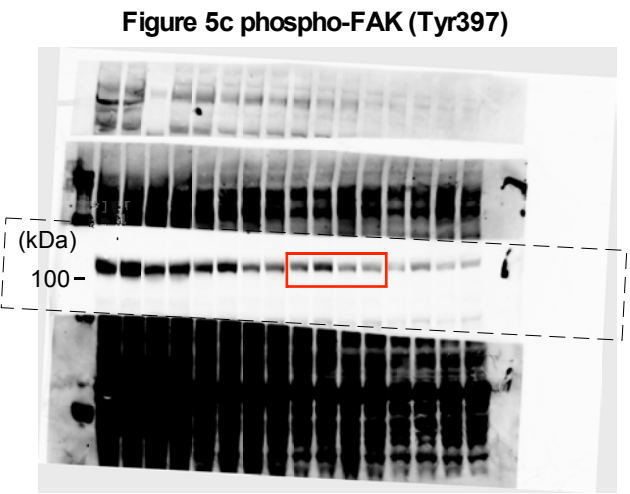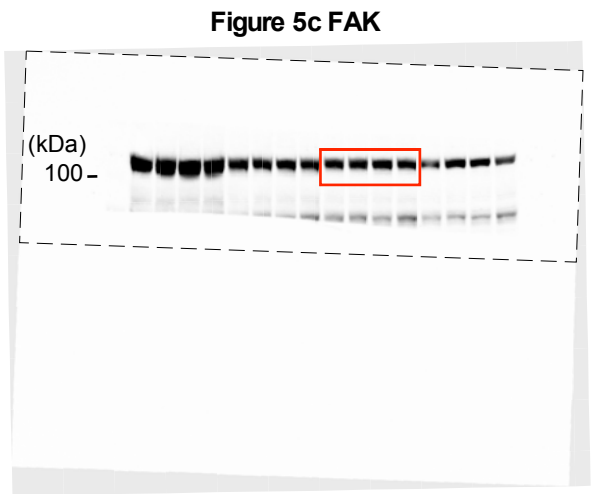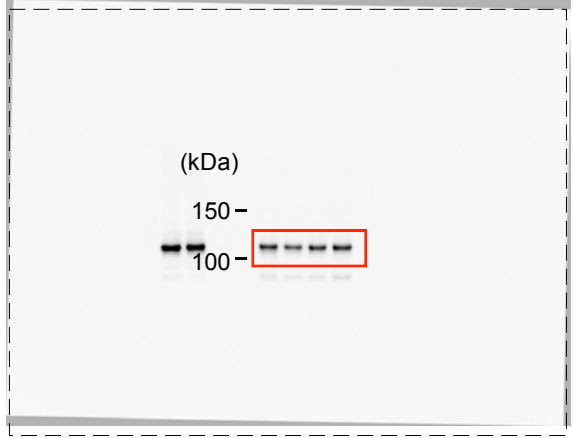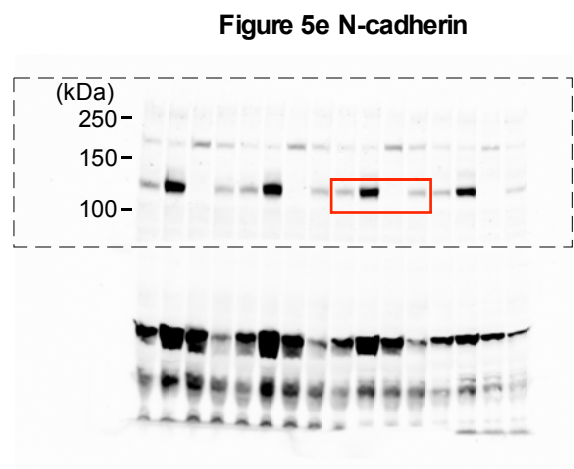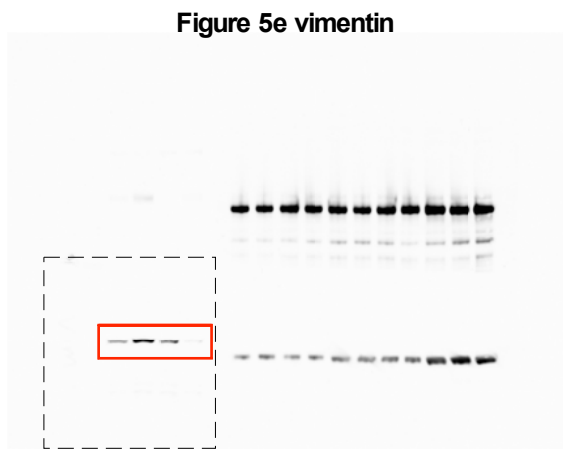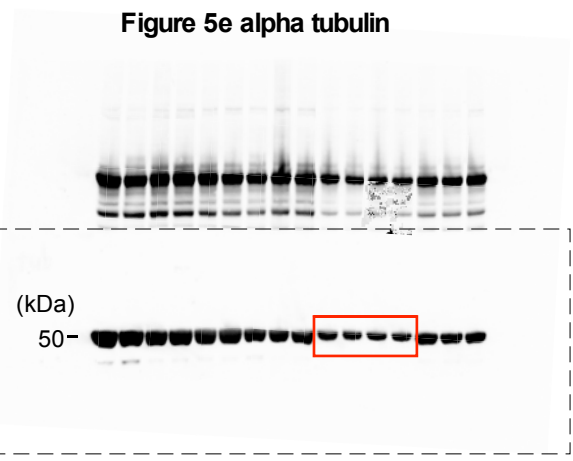

**Supplementary Figure 6. Unprocessed blot images in Figs. 5a, c, e. Dotted squares indicate blotting membranes. Red squares indicate cropped sections.**

Figure 6b E-cadherin

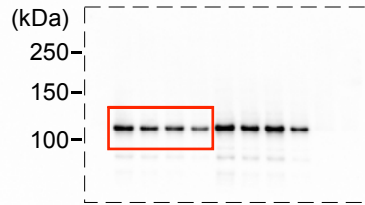

Figure 6b N-cadherin

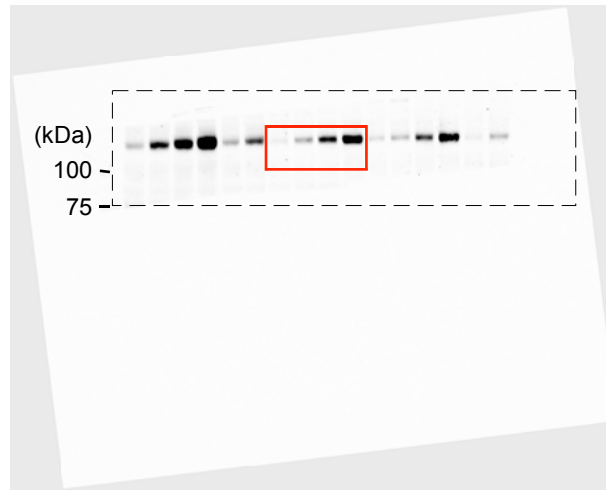

Figure 6b vimentin

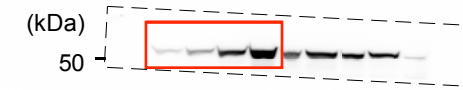

Figure 6b ZEB1

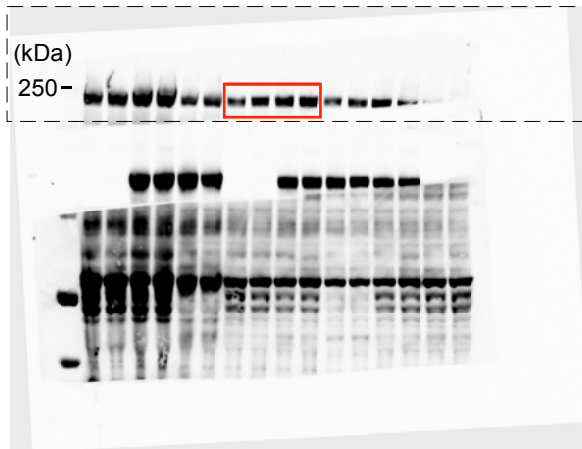

Figure 6b beta3 integrin

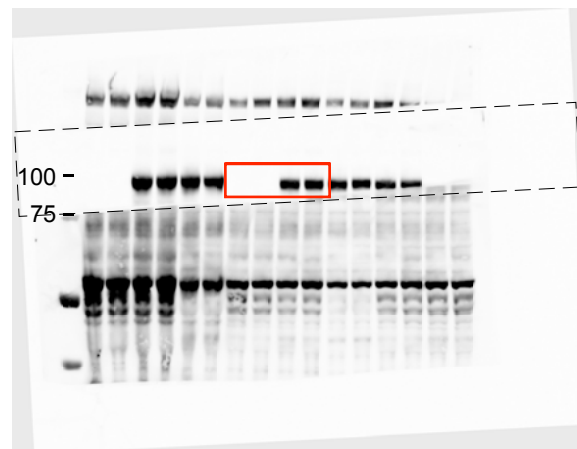

Figure 6b alpha-tubulin

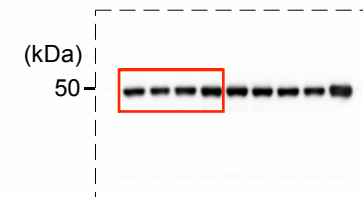

**Supplementary Figure 7. Unprocessed blot images in Fig. 6b.** Dotted squares indicate blotting membranes. Red squares indicate cropped sections.



Figure 6c E-cadherin

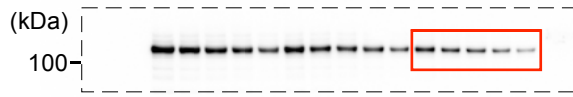

Figure 6c N-cadherin

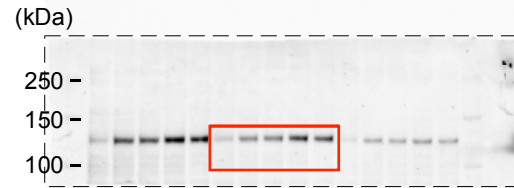

Figure 6c vimentin

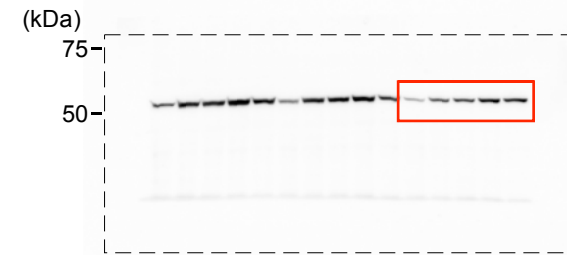

Figure 6c beta3 integrin

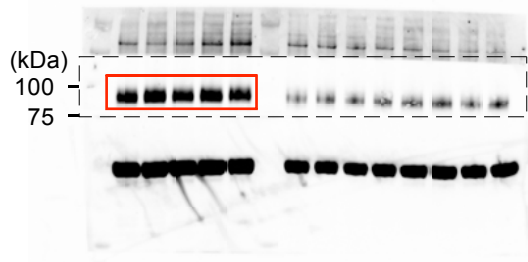

Figure 6c ZEB1

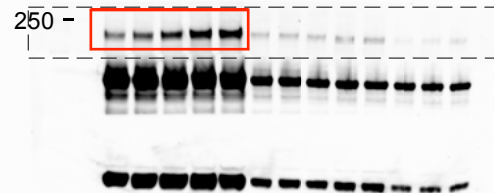

Figure 6c alpha v integrin

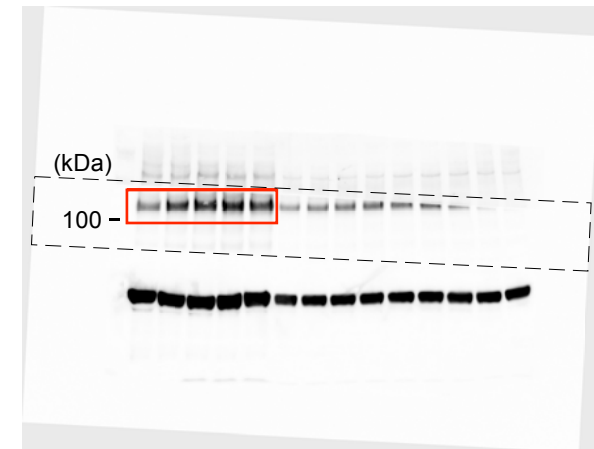

Figure 6c alpha-tubulin

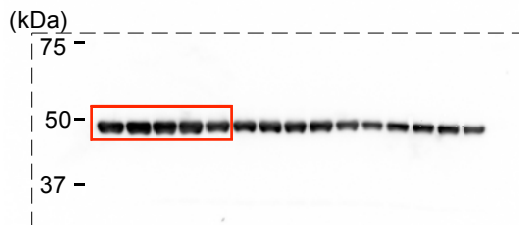

**Supplementary Figure 8. Unprocessed blot images in Fig. 6c.** Dotted squares indicate blotting membranes. Red squares indicate cropped sections.

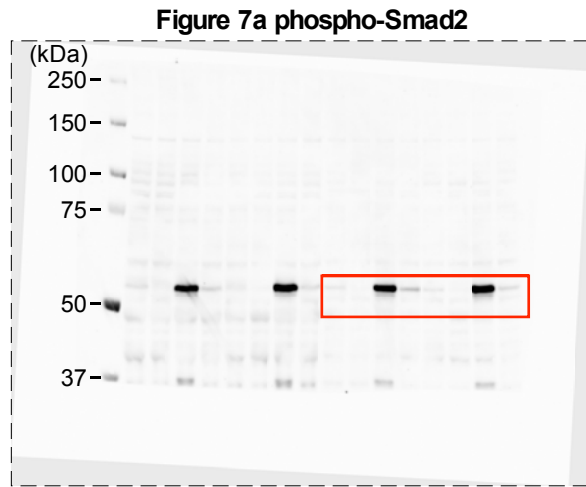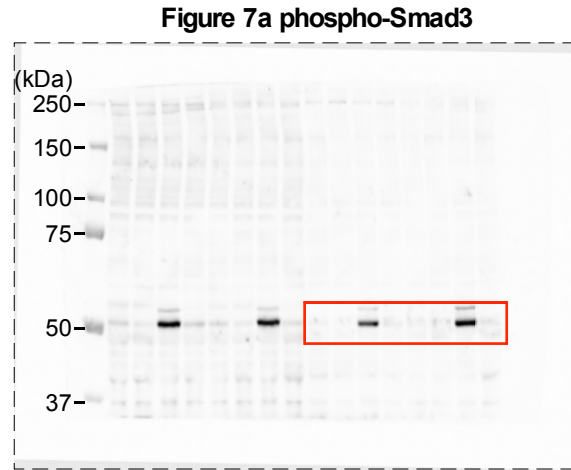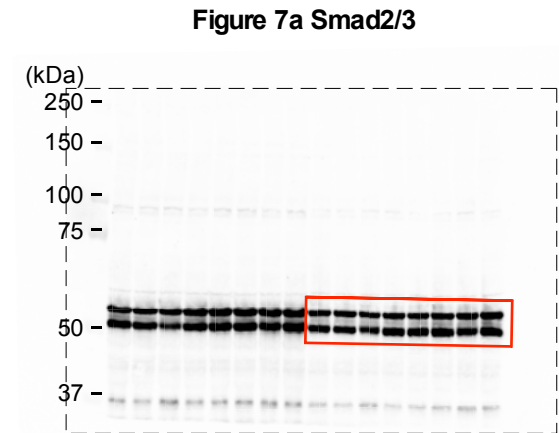

(kDa)

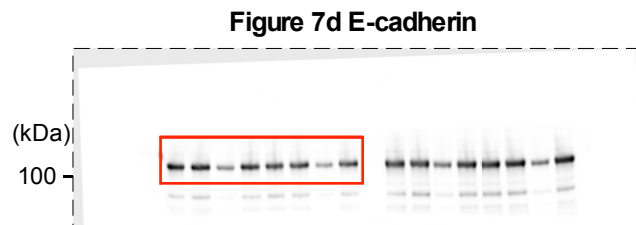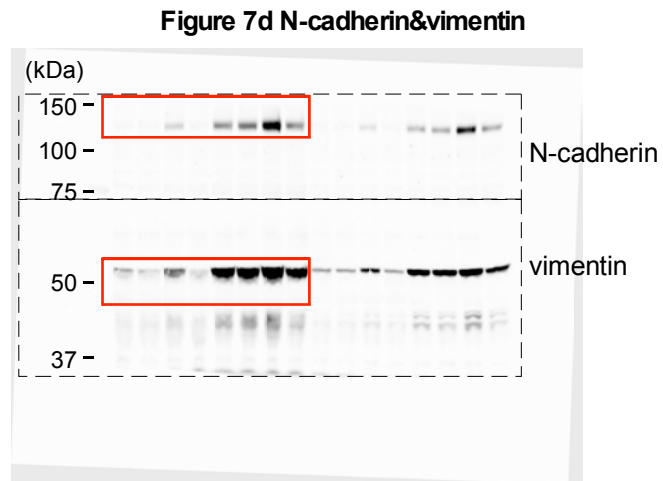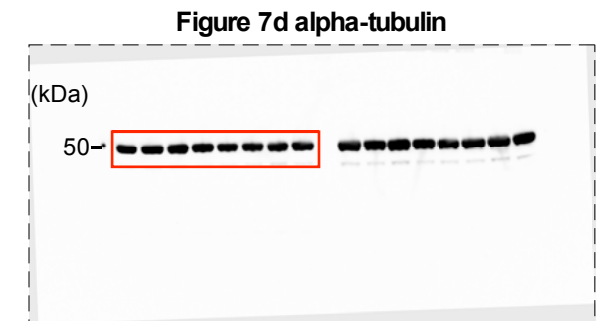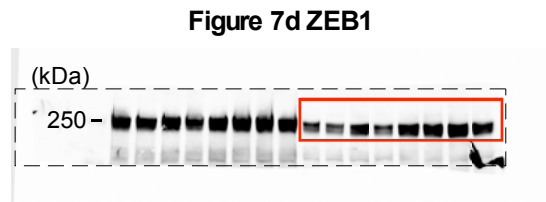

**Supplementary Figure 9. Unprocessed blot images in Figs. 7a, d. Dotted squares indicate blotting membranes. Red squares indicate cropped sections.**

Figure 8c E-cadherin

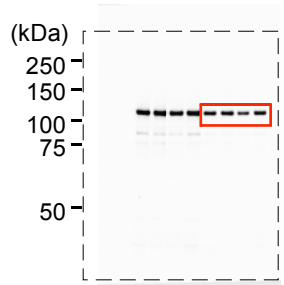

Figure 8c N-cadherin

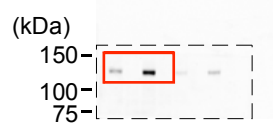

Figure 8c vimentin

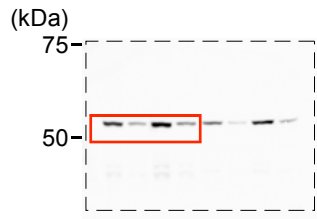

Figure 8c ZEB1

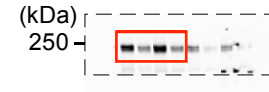

Figure 8c alpha-tubulin

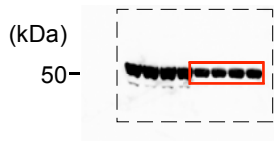

Figure 8c phospho-Smad2

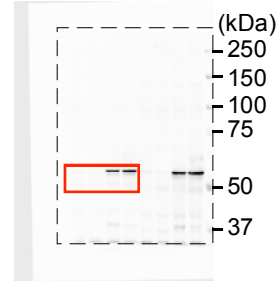

Figure 8c phospho-Smad3

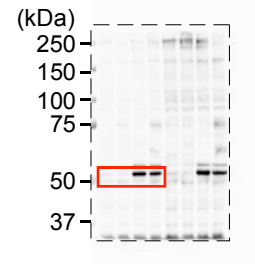

Figure 8c Smad2/3

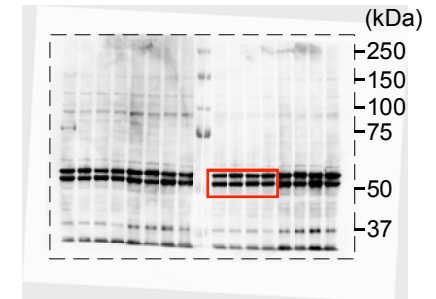

Figure 8e alpha v

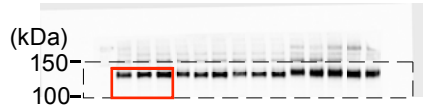

Figure 8e beta3 integrin

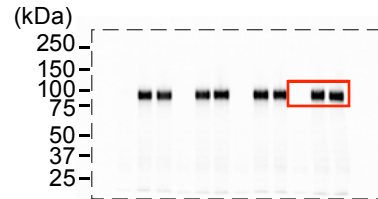

Figure 8e alpha-tubulin

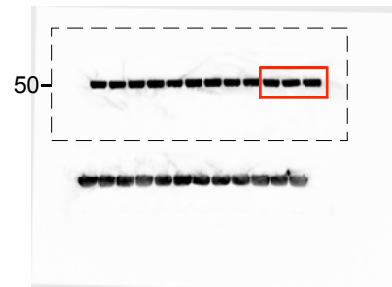

Supplementary Figure 10. Unprocessed blot images in Figs. 8c, e. Dotted squares indicate blotting membranes. Red squares indicate cropped sections.
