# Supplementary material for: αvβ3 Integrin induces partial EMT independent of TGF-β signaling
Source: PubMed Central journal article supplement (PMC8060333; doi:10.1038/s42003-021-02003-6), 2021-04-21
Supplement: 42003_2021_2003_MOESM2_ESM.pdf [file 42003_2021_2003_MOESM2_ESM.pdf]

## Description of Additional Supplementary Files

**File name:** Supplementary Data 1

**Description:** The source data behind the graphs in the paper.
